# Supplementary material for: Ambiguity of non-systematic chemical identifiers within and between small-molecule databases
Source: Springer Nature journal article supplement (doi:10.1186/s13321-015-0102-6), 2015-11-16
Supplement: 13321_2015_102_MOESM1_ESM.pdf [file 13321_2015_102_MOESM1_ESM.pdf]

# **Ambiguity of non-systematic chemical identifiers within and between small-molecule databases**

Saber A. Akhondi<sup>1§</sup>, Sorel Muresan<sup>2</sup>, Antony J. Williams<sup>3</sup>, Jan A. Kors<sup>1</sup>

## **Supplementary data**

**Appendix table 1: The effect of all standardization settings on reducing ambiguity of non-systematic identifiers across databases.**

| Database               | FICTS | uICTS | FuCTS | FluTS | FICuS | FICTu |
|------------------------|-------|-------|-------|-------|-------|-------|
| ChEBI-ChEMBL           | 39.50 | 21.95 | 39.45 | 38.39 | 37.51 | 32.56 |
| ChEBI-ChemSpider-V     | 39.85 | 36.47 | 39.76 | 36.37 | 36.40 | 26.14 |
| ChEBI-DrugBank         | 28.65 | 15.53 | 28.65 | 27.31 | 26.82 | 23.25 |
| ChEBI-HMDB             | 49.59 | 47.41 | 49.35 | 44.78 | 44.91 | 32.28 |
| ChEBI-NPC              | 40.68 | 31.18 | 40.63 | 40.17 | 38.76 | 26.81 |
| ChEBI-PubChem          | 36.92 | 32.92 | 35.77 | 34.42 | 34.96 | 24.13 |
| ChEBI-TTD              | 27.69 | 20.87 | 27.69 | 26.89 | 27.18 | 15.18 |
| ChEMBL- ChemSpider-V   | 43.64 | 34.12 | 43.57 | 43.55 | 41.85 | 27.33 |
| ChEMBL- DrugBank       | 39.56 | 22.59 | 39.53 | 39.39 | 38.88 | 32.57 |
| ChEMBL- HMDB           | 48.43 | 36.13 | 48.26 | 48.39 | 47.61 | 33.03 |
| ChEMBL- NPC            | 46.41 | 31.07 | 46.34 | 46.40 | 45.55 | 36.16 |
| ChEMBL- PubChem        | 33.07 | 25.20 | 32.69 | 33.01 | 30.91 | 23.96 |
| ChEMBL- TTD            | 36.94 | 24.58 | 36.83 | 36.77 | 35.84 | 25.98 |
| ChemSpider-V- DrugBank | 45.24 | 37.21 | 45.23 | 45.15 | 40.93 | 33.41 |
| ChemSpider-V- HMDB     | 43.92 | 42.37 | 43.91 | 42.56 | 43.00 | 23.34 |
| ChemSpider-V- NPC      | 48.60 | 37.31 | 48.55 | 48.51 | 45.49 | 31.63 |
| ChemSpider-V- PubChem  | 41.61 | 37.14 | 41.44 | 41.15 | 39.32 | 25.38 |
| ChemSpider-V- TTD      | 40.28 | 32.71 | 40.21 | 40.07 | 35.06 | 22.95 |
| DrugBank- HMDB         | 30.66 | 30.37 | 30.66 | 30.64 | 29.90 | 16.14 |
| DrugBank- NPC          | 21.92 | 21.26 | 21.92 | 21.90 | 20.78 | 13.53 |
| DrugBank- PubChem      | 46.78 | 37.58 | 46.62 | 46.60 | 45.43 | 34.63 |
| DrugBank- TTD          | 18.22 | 16.78 | 18.22 | 18.09 | 17.45 | 10.14 |
| HMDB- NPC              | 44.42 | 43.46 | 44.37 | 44.31 | 43.76 | 21.21 |
| HMDB- PubChem          | 43.32 | 40.86 | 43.01 | 42.73 | 42.34 | 26.71 |
| HMDB- TTD              | 43.00 | 41.11 | 43.00 | 42.92 | 41.56 | 22.01 |
| NPC- PubChem           | 49.75 | 38.41 | 49.52 | 49.63 | 36.81 | 35.14 |
| NPC- TTD               | 22.36 | 20.64 | 22.31 | 22.14 | 21.12 | 9.18  |
| PubChem- TTD           | 25.38 | 21.60 | 25.28 | 25.15 | 23.87 | 13.77 |
| ChemSpider- ChEBI      | 30.88 | 28.40 | 30.48 | 28.39 | 28.09 | 19.45 |

|                      |       |       |       |       |       |       |
|----------------------|-------|-------|-------|-------|-------|-------|
| ChemSpider- ChEMBL   | 29.89 | 24.96 | 29.76 | 29.72 | 27.32 | 17.82 |
| ChemSpider- DrugBank | 50.67 | 41.44 | 50.60 | 50.20 | 47.87 | 35.94 |
| ChemSpider- HMDB     | 57.28 | 54.36 | 57.12 | 56.25 | 55.71 | 34.35 |
| ChemSpider- NPC      | 60.22 | 45.90 | 60.01 | 59.86 | 58.16 | 45.12 |
| ChemSpider- PubChem  | 17.70 | 16.07 | 17.59 | 17.53 | 16.85 | 9.02  |
| ChemSpider- TTD      | 32.26 | 27.82 | 32.12 | 31.81 | 29.94 | 17.83 |
